# Gene deletions in an infertile man with sperm fibrous sheath dysplasia

B.Baccetti, G.Collodel, M.Estenoz<sup>1</sup>, D.Manca, E.Moretti and P.Piomboni<sup>2</sup>

Department of Pediatrics, Obstetrics and Reproductive Medicine, Section of Biology, Siena University, Regional Referral Center for Male Infertility, Azienda Ospedaliera Universitaria Senese, Siena and <sup>1</sup>Institute of Clinical Physiology, Siena Branch, National Research Council, Siena, Italy

<sup>2</sup>To whom correspondence should be addressed. Department of Pediatrics, Obstetrics and Reproductive Medicine, Section of Biology, University of Siena, Policlinico Le Scotte, Viale Bracci, 14, 53100 Siena, Italy. E-mail: piomboni@unisi.it.

**BACKGROUND:** Asthenozoospermia may sometimes be related to genetic structural defects of the sperm tail detectable by transmission electron microscopy. Dysplasia of the fibrous sheath (DFS) is a genetic sperm defect, characterized by dysplastic development of the axonemal and periaxonemal cytoskeleton. We report the case of an infertile man with normal sperm count and total sperm immotility in which dysplasia of the fibrous sheath, Akap3, Akap4 gene deletions, meiotic segregation of chromosomes 18, X and Y and Y microdeletions were investigated. **METHODS:** A 32-year-old man with a 3-year history of primary infertility presented at our Regional Referral Center for Male Infertility. Family medical history, lymphocyte karyotype, PCR analysis, physical examination, hormone assays and semen analysis were performed. **RESULTS:** Ultrastructural sperm evaluation showed dysplasia of the fibrous sheath. Immunostaining of AKAP4 protein was negative in sperm tails. PCR analysis revealed intragenic deletions of the Akap3 and Akap4 genes. Fluorescence *in situ* hybridization on sperm showed a high frequency of XY disomy. **CONCLUSION:** In this infertile patient, our results suggest a possible relationship between dysplasia of the fibrous sheath, partial deletions in the Akap3 and Akap4 genes and absence of AKAP4 protein in the fibrous sheath. These findings, however, were not detected in another four patients with dysplasia of the fibrous sheath. Our results require future confirmatory molecular analyses.

**Key words:** Akap3/Akap4 deletions/DFS/FISH analysis/male infertility/TEM

## Introduction

Infertility affects an estimated 15% of couples: a male factor has been identified in approximately 50% of infertility cases (Bhasin *et al.*, 1994). Poor sperm morphology or motility may be responsible for male infertility. In rare cases, asthenozoospermia may be caused by genetic structural defects of the sperm tail detectable by transmission electron microscopy (TEM). The genetic sperm alteration dysplasia of the fibrous sheath (DFS) (Chemes *et al.*, 1987, 1998) is characterized by dysplastic development of the axonemal and periaxonemal cytoskeleton. The genetic origin of this defect has been suggested by different authors (Chemes, 2000; Baccetti *et al.*, 2001). In humans, two major proteins of the sperm fibrous sheath, AKAP82 and its precursor pro-AKAP82, were cloned and characterized (Carrera *et al.*, 1996; Turner *et al.*, 1998). Recently, Eddy *et al.* (2003) demonstrated that two A-kinase anchoring proteins (AKAP3, AKAP4) are the most abundant structural proteins of the fibrous sheath. AKAP3 is involved in organizing the basic structure of the fibrous sheath, whereas AKAP4 has a major role in completing fibrous sheath assembly (Brown *et al.*, 2003). No evidence has yet been found to support the hypothesis that mutations in either

gene for AKAP3 and AKAP4 proteins are responsible for DFS in humans (Turner *et al.*, 2001b).

Genetic male infertility may also be associated with deletions of specific regions of the long arm of the Y chromosome. Y microdeletion screening is especially worthwhile in patients with a sperm count below  $5 \times 10^6/\text{ml}$  or even below  $10 \times 10^6/\text{ml}$ . PCR analysis for Yq microdeletions in 392 normospermic men did not reveal any deletions (Krausz *et al.*, 2003). A new model of deletions in which AZFb and AZFc regions overlap has emerged. Repping *et al.* (2002) suggested at least three different deletion patterns as a consequence of AZFb and AZFc deletions.

Most studies using multicolour fluorescence *in situ* hybridization (FISH) demonstrate that infertile men may also have a higher frequency of sperm chromosomal abnormalities (Martin *et al.*, 1996; Bernardini *et al.*, 1997; Rives *et al.*, 1998), in particular when DFS sperm defect is present (Baccetti *et al.*, 2005).

In this paper we report the results of different molecular analyses performed in an infertile man with DFS. PCR was carried out on DNA extracted from peripheral blood lymphocytes to analyse specific Y microdeletions and partial sequences

of the AKAP4 and AKAP3 genes. Meiotic segregation pattern was also investigated by three-colour FISH sperm analysis.

## Materials and methods

### Patient

A 32-year-old man was referred to our laboratory for semen analysis after 3 years of sexual intercourse without conception. His wife, age 30 years, did not have any fertility problems. Sexual development, medical history, physical examination and serum hormone levels (testosterone, cortisol, T3, T4, TSH, estradiol, FSH, LH, prolactin and inhibin-B) were normal. Semen and urethral fluid were tested for microbial infection. Consanguinity was excluded. Lymphocyte karyotype was 46,XY.

### Semen analysis

#### Light and electron microscopy

A semen sample was collected by masturbation after 4 days of sexual abstinence and examined after liquefaction for 30 min at 37°C. Volume, pH, concentration and motility were evaluated according to WHO guidelines (World Health Organization, 1999).

For electron microscopy, semen was fixed in cold Karnovsky fixative and maintained at 4°C for 2 h. Fixed semen was washed in 0.1 mol/l cacodylate buffer (pH 7.2) for 12 h, postfixed in 1% buffered osmium tetroxide for 1 h at 4°C, dehydrated and embedded in Epon Araldite. Ultra-thin sections were cut with a Supernova ultra-microtome (Reichert Jung, Vienna, Austria), mounted on copper grids, stained with uranyl acetate and lead citrate, and observed and photographed with a Philips CM10 transmission electron microscope (TEM; Philips Scientifics, Eindhoven, The Netherlands). Three hundred sperm in ultra-thin sections were analysed.

An aliquot from the same sperm sample was also processed for scanning electron microscopy, fixing the spermatozoa as described above and smearing them on polylysine (1%)-coated coverslips. After dehydration specimens were dried by the critical point technique, coated in gold and observed with a Philips CM 515 scanning electron microscope (Philips Scientifics, Eindhoven, The Netherlands).

#### PCR analysis

DNA was extracted from peripheral blood lymphocytes using the QIAamp DNA Blood Kit (Qiagen).

PCR analysis for Y microdeletion screening was performed according to European Academy of Andrology (EAA) guidelines (Simoni *et al.*, 2004).

Control DNA was extracted from blood of 10 male donors, age 30–40 years, with a documented history of fertility. DNA extracted from blood of two fertile females was used as negative control.

PCR product corresponding to the region of pro-hAKAP82 that encodes the RII-binding domain was amplified according to Turner *et al.* (2001a). Oligonucleotide primers flanking the RII-binding site were used: sense primer, 5'-GCGATTATCACAGCATCC-3'; antisense primer, 5'-TGCTCTCTCTCTGGGACATC-3'.

PCR products corresponding to a region of hAKAP4 involved in binding to AKAP3 (site 1) and to a region of AKAP3 involved in binding to hAKAP4 (site 2) were amplified according to Turner *et al.* (2001b). Oligonucleotide primers flanking the respective binding sites, were used: site 1, sense primer, 5'-TCAGTGCCCTTATAGGTGAG-3'; antisense primer, 5'-GCAGAGCTTCATCACAGATTC-3'; site 2, sense primer, 5'-TTGAGGAATCTCCACAGCG-3'; antisense primer, 5'-CCAACGGTCTTTACACAACCTC-3'.

Control DNA was extracted from blood of a fertile man and four infertile men with DFS sperm defect.

### Immunofluorescence

Semen samples of the patient and fertile men, used as controls, were washed twice in phosphate buffered saline (PBS), smeared on glass slides, air-dried, rinsed in PBS and fixed for 15 min in methanol at -20°C. Slides were then treated with blocking solution (PBS, 1% BSA, 5% normal goat serum [NGS]) for 20 min at room temperature and incubated overnight at 4°C with mouse monoclonal anti- $\beta$ -tubulin (Sigma Chemical, St Louis, MO, USA) and mouse monoclonal anti-AKAP 82 (BD Biosciences, Erembodegem, Belgium) diluted 1:100 and 1:50 respectively in PBS, 0.1% BSA, 1% NGS. After three washes in PBS, the samples were treated with goat anti-mouse IgG-Texas Red-conjugated antibody (Southern Biotechnology Associates, Birmingham, AL, USA). Finally, the samples were washed three times in PBS and mounted with Vectashield (Vector Laboratories, Burlingame, CA, USA). Incubation in primary antibodies was omitted in procedure control samples. Observations and photographs were made with a Leitz Aristoplan light microscope equipped with fluorescence apparatus.

### FISH sperm analysis

FISH sperm analysis was carried out according to Baccetti *et al.* (2003) to evaluate aneuploidy frequency. A mix of  $\alpha$ -satellite DNA probes (CEP, Vysis, IL) for chromosomes 18, X and Y, directly labelled with different fluorochromes, was used.

## Results

Spermogram evaluation showed that sperm count was  $35 \times 10^6$ /ml and sperm motility 0%. Extremely short tails were observed by light microscopy. The eosin Y test revealed 82% live sperm.

The genotypic sperm defect DFS was demonstrated by TEM (Figure 1a) in the whole sperm population. Sperm tails were extremely short, as confirmed also by scanning electron microscopy (Figure 1b). A disorganized fibrous sheath and altered axonemal structure, sometimes lacking dynein arms and microtubular doublets including the central pair, were observed. Although spermatozoa with these defects usually have well formed acrosomes and nuclei (Baccetti *et al.*, 1993), in this case we found severe nuclear alterations, particularly in chromatin texture, in almost the entire sperm population.

Immunofluorescence staining using monoclonal anti- $\beta$ -tubulin confirmed short, thick axonemal structure (Figure 2a, b). Immunofluorescence staining, using a monoclonal anti-AKAP82 antibody specific for human AKAP4 protein (previously named AKAP82), was completely negative (Figure 2c, d). In control samples (Figure 2e), the same antibody labelled the tail principal piece. Anti-tubulin antibody recognized the centriolar region and principal piece of the sperm tail in control samples (Figure 2f).

FISH was performed on sperm nuclei to evaluate aneuploidy frequency (Table I). We examined 4233 sperm. Only XY disomy was more frequent than in controls (Baccetti *et al.*, 2003); the frequency of other disomies and diploidies was normal.

PCR screening of specific Y chromosome according to EAA guidelines (Simoni *et al.*, 2004) did not evidence any deletions in the regions investigated.

When we performed PCR using two pairs of primers flanking sites 1 and 2, as described by Turner *et al.* (2001b), the expected PCR products corresponding to a region of hAKAP4 involved in binding to AKAP3 (site 1) and to a region of AKAP3 involved in binding to hAKAP4 (site 2) were both absent (Figure 3, lanes C2, 3). This was confirmed by three

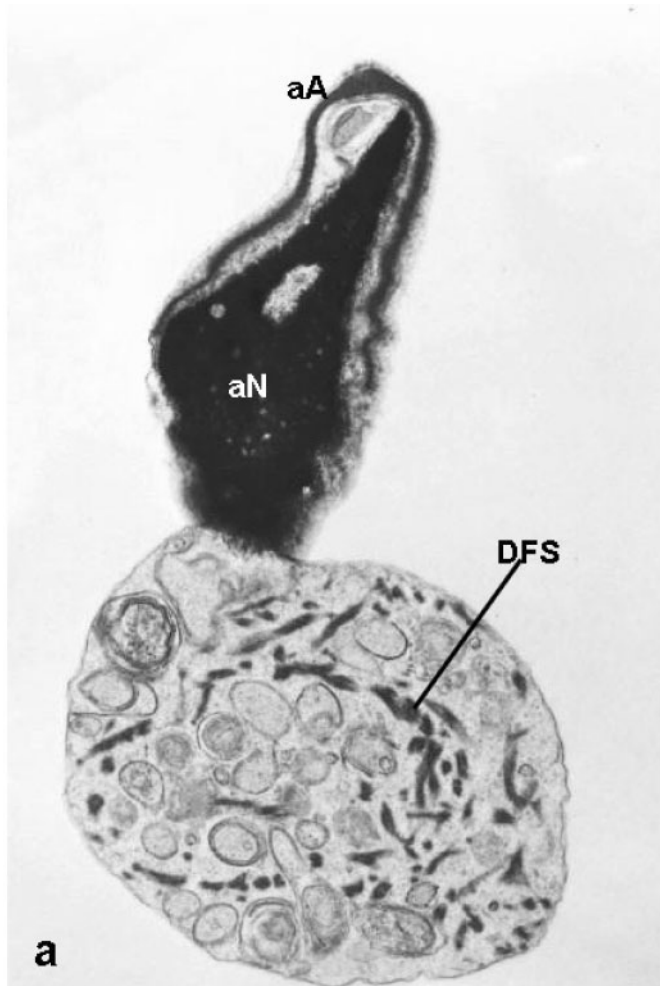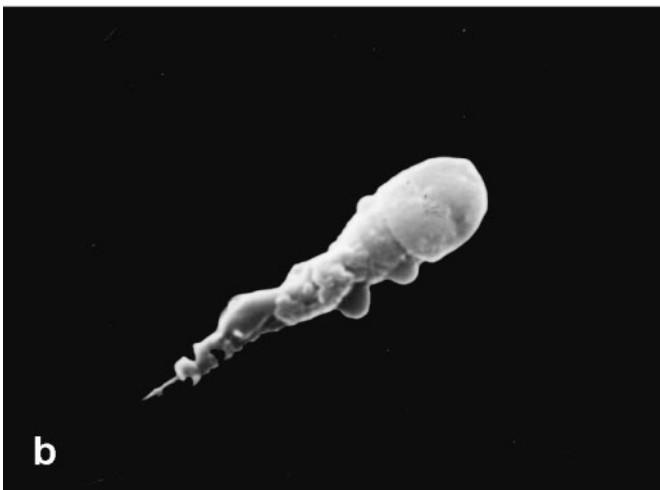

**Figure 1.** (a) TEM micrograph of a longitudinal section of sperm with altered acrosome (aA) and nucleus (aN), showing dysplasia of the fibrous sheath (DFS), which is completely disorganized in remnants embedded in a cytoplasmic residue.  $\times 20\,000$ . (b) SEM micrograph of a DFS sperm, with a very short tail.  $\times 5400$ .

subsequent PCR attempts. The same sequences were present in a fertile man (Figure 3, lanes A2, 3) and four infertile men with DFS (Figure 3, lanes B2,3, D2,3, E2,3, F2,3), who were analysed as controls (Figure 3). In all DFS patients, including our

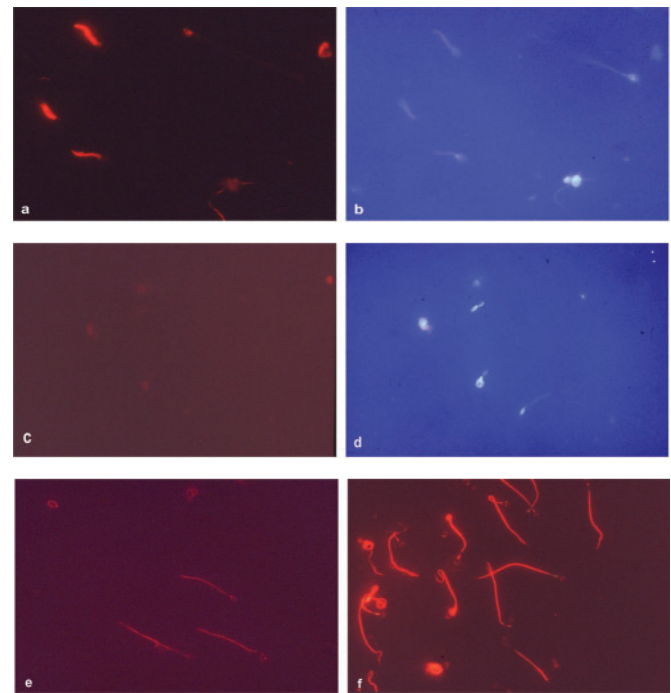

**Figure 2.** UV and blue light micrographs of ejaculated spermatozoa. (a, b) Staining with monoclonal anti- $\beta$ -tubulin antibody highlighted very short thick axonemes. (c, d) Immunocytochemical labelling with anti-AKAP82 monoclonal antibody was completely negative. (e, f) Labelling with anti- $\beta$ -tubulin and anti-AKAP82 monoclonal antibodies was normal in the principal piece of sperm of fertile men, used as control.  $\times 4$ .

studied case, and in the control fertile man, PCR products corresponding to pro-hAkap82, which encodes the RII-binding domain, were present (Figure 3, lane 1, A–F)

## Discussion

In the present study we report the case of an infertile patient who was a carrier of the genetic DFS sperm defect associated with deletion of partial sequences of potential AKAP4/AKAP3 binding regions.

TEM demonstrated the presence of a peculiar ultrastructural defect of the sperm tail, namely dysplasia of the fibrous sheath. This defect, like other genetic sperm defects, is more frequent in consanguineous patients and is related to the degree of consanguinity (Baccetti *et al.*, 2001). DFS includes a heterogeneous array of structural defects of the sperm tail (Chemes and Rawe, 2003) and causes almost complete immotility, but nuclear and acrosomal structure are generally unaffected. In our patient, however, we observed severe nuclear alterations, particularly in chromatin texture and condensation.

For this reason, screening for Y microdeletion was carried out even though the patient had a normal sperm count. No Y microdeletions were detected. This coincides with the results of Krausz *et al.* (2003), who failed to detect Y microdeletions in normospermic individuals. On the other hand, we found an absence of the potential AKAP4/AKAP3 binding regions in the patient under study while the presence of these PCR products was detected in fertile men and other infertile men with

**Table 1.** FISH analysis for chromosomes 18, X and Y

|                       | Normal sperm | Frequencies of disomies |               |       | Frequencies of diploidies |               |           |           |
|-----------------------|--------------|-------------------------|---------------|-------|---------------------------|---------------|-----------|-----------|
|                       | X/Y-bearing  | 18, 18                  | X,X           | Y,Y   | X,Y                       | 18,18,X,X     | 18,18,Y,Y | 18,18,X,Y |
| Patient <sup>a</sup>  | 48%/50%      | 0.11%                   | 0.05%         | 0.17% | 0.45%                     | 0.17%         | 0.05%     | 0.21%     |
| Controls <sup>b</sup> |              | 0.11 ± 0.003%           | 0.23 ± 0.003% |       |                           | 0.28 ± 0.004% |           |           |

<sup>a</sup>Number of cells scored by triple FISH analysis was 4233. The frequencies of nullisomies were: 18/0 = 0.02%; X/0 = 0.04%; Y/0 = 0.01%. Multiple fluorescent signals (>4) were detected in 0.21% of cells.

<sup>b</sup>Seven fertile men constituted the control group. Mean percentages (± SD) of disomies and diploidies are reported for the chromosomes examined. The number of sperm scored by triple-FISH analysis was 5600 ± 260.

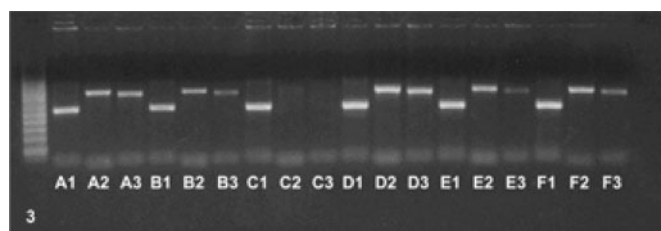

**Figure 3.** PCR analysis in five DFS patients (lanes B–F) and one fertile man (lane A) used as control. Lane 1: amplification products of pro-hAkap82 gene. Lane 2: amplification products of hAkap4 gene region involved in the binding to Akap3 (site1). Lane 3: amplification products of Akap3 region involved in the binding to hAkap4 (site 2). Lanes 2 and 3 were completely absent only in the patient (C).

DFS, analysed as controls. Turner *et al.* (2001b) did not find evidence to support the hypothesis that mutations in Akap4 or Akap3 are responsible for DFS in humans. However, in our case, deletion of the Akap4/Akap3 binding regions and failure to detect AKAP4 protein by immunofluorescence in the fibrous sheath of sperm tails suggests that, in this case, the lack of AKAP4 could be pathogenically responsible for the DFS phenotype.

Partial deletions of Akap3 and Akap4 gene sequences could therefore be related to defective assembly of fibrous sheath components and failure of compartmentalization of AKAP3 and AKAP4 proteins in the tail, causing sperm immotility. AKAP-3 is involved in organizing the basic structure of the fibrous sheath, while AKAP4 has a major role in completing fibrous sheath assembly. Their absence is linked to sperm immotility because the fibrous sheath lacks any signal transduction system (Miki *et al.*, 2002; Brown *et al.*, 2003).

Our findings suggest that, in some cases, the DFS sperm defect could be associated with alterations of Akap3 and Akap4 gene sequences.

Our results would require future confirmation. It would be useful to perform an immunoblot with the anti-AKAP4 antibody, in order to show whether there is any AKAP4 protein being formed.

Finally, FISH analysis highlighted an increased frequency of sex chromosome (XY) disomy in our patient, indicating a segregation anomaly at the first meiotic division. This rare combination of genetic and sperm defects is responsible for fertilization failure *in vivo*.

Intracytoplasmic sperm injection could be the only tool able to bypass the reproductive problem in these kinds of patients. Nevertheless, the possibility of transmission of different genetic anomalies to the offspring should be considered in

genetic counselling before undergoing micromanipulative assisted reproduction.

## Acknowledgements

We thank Dr Giacomo Scapigliati and Dr Emanuele Bruni for technical support. This study was financed by University of Siena P.A.R. grant 2003 and Azienda Ospedaliera Universitaria Senese, Siena, Italy.

## References

- Baccetti B, Burrini AG, Capitani S, Collodel G, Moretti E, Piomboni P and Renieri T (1993) Notulae seminologicae. 2. The 'short tail' and 'stump' defect in human spermatozoa. *Andrologia* 25,331–335.
- Baccetti B, Capitani S, Collodel G, Di Cairano G, Gambera L, Moretti E and Piomboni P (2001) Genetic sperm defects and consanguinity. *Hum Reprod* 16,1365–1371.
- Baccetti B, Bruni E, Collodel G, Gambera L, Moretti E, Marzella R and Piomboni P (2003) 10,15 reciprocal translocation in an infertile man: ultrastructural and fluorescence *in situ* hybridization sperm study: case report. *Hum Reprod* 18,2302–2308.
- Baccetti B, Collodel G, Gambera L, Moretti E, Serafini F and Piomboni P (2005) Fluorescence *in situ* hybridization and molecular studies in infertile men with dysplasia of the fibrous sheath. *Fertil Steril*, in press.
- Bernardini L, Martini E, Geraedts JP, Hopman AH, Lanteri S, Conte N and Capitano GL (1997) Comparison of gonosomal aneuploidy in spermatozoa of normal fertile men and those with severe male factor detected by *in situ* hybridization. *Mol Hum Reprod*, 3,431–438.
- Bhasin S, de Kretser DM and Baker HW (1994) Clinical review 64: Pathophysiology and natural history of male infertility. *J Clin Endocrinol Metab* 79, 1525–1529.
- Brown PR, Miki K, Harper DB and Eddy EM (2003) A-kinase anchoring protein 4 binding proteins in the fibrous sheath of the sperm flagellum. *Biol Reprod* 68,2241–2248.
- Carrera A, Moos J, Ning XP, Gerton GL, Tesarik J, Kopf GS and Moss SB. (1996) Regulation of protein tyrosine phosphorylation in human sperm by a calcium/calmodulin-dependent mechanism: identification of A kinase anchor proteins as major substrates for tyrosine phosphorylation. *Dev Biol* 180,284–296.
- Chemes HE. Phenotypes of sperm pathology: genetic and acquired forms in infertile men (2000) *J Androl* 21,799–808.
- Chemes HE and Rawe VY (2003) Sperm pathology: a step beyond descriptive morphology. Origin, characterization and fertility potential of abnormal sperm phenotypes in infertile men. *Hum Reprod* 9,405–428.
- Chemes HE, Brugo S, Zanchetti C, Carrere C and Lavieri JC (1987) Dysplasia of the fibrous sheath: an ultrastructural defect of human spermatozoa associated with sperm immotility and primary sterility. *Fertil Steril* 48,664–669.
- Chemes HE, Olmedo SB, Carrere C, Osés R, Carizza C, Leisner M and Blanquie J (1998) Ultrastructural pathology of the sperm flagellum: association between flagellar pathology and fertility prognosis in severely asthenozoospermic men. *Hum Reprod* 9,2521–2526.
- Eddy EM, Toshimori K and O'Brien DA (2003) Fibrous sheath of mammalian spermatozoa. *Microsc Res Tech* 61,103–115.
- Krausz C, Forti G and McElreavey K (2003) The Y chromosome and male fertility and infertility. *Int J Androl* 26,70–75.
- Martin RH, Spriggs E and Rademaker AW (1996) Multicolor fluorescence *in situ* hybridization analysis of aneuploidy and diploidy frequencies in 225846 sperm from normal men. *Biol Reprod* 54,394–398.

- Miki K, Willis WD, Brown PR, Goulding EH, Fulcher KD and Eddy EM (2002) Targeted disruption of the AKAP4 gene causes defects in sperm flagellum and motility. *Dev Biol* 248,331–342.
- Repping S, Skaletsky H, Lange J, Silber S, van der Veen F, Oates RD, Page DC and Rozen S (2002) Recombination between palindromes P5 and P1 on the human Y chromosome causes massive deletions and spermatogenic failure. *Am J Hum Genet* 71,906–922.
- Rives N, Mazurier S, Sibert L, Simeon N, Joly G and Mace B (1998) Incidence of aneuploidy in sperm nuclei of infertile men. *Hum Reprod* 13,126–127, O245.
- Simoni M, Bakker E and Krausz C (2004) EAA/EMQN best practice guidelines for molecular diagnosis of y-chromosomal microdeletions. State of the art 2004. *Int J Androl* 27,240–249.
- Turner RM, Johnson LR, Haig-Ladewig L, Gerton GL and Moss SB (1998) An X-linked gene encodes a major human sperm fibrous sheath protein, hAKAP82. Genomic organization, protein kinase A-RII binding, and distribution of the precursor in the sperm tail. *J Biol Chem* 273,32135–32141.
- Turner RM, Foster JA, Gerton GL, Moss SB and Patrizio P (2001a) Molecular evaluation of two major human sperm fibrous sheath proteins, pro-hAKAP82 and hAKAP82, in stump tail sperm. *Fertil Steril* 76,267–274.
- Turner RMO, Musse MP, Mandal A, Klotz K, Jayes FCL, Herr JC, Gerton GL, Moss SB and Chemes HE (2001b) Molecular genetic analysis of two human sperm fibrous sheath proteins, AKAP4 and AKAP3, in men with dysplasia of the fibrous sheath. *J Androl* 22,302–315.
- World Health Organization (1999) WHO laboratory manual for the examination of human semen and semen-cervical mucus interaction. 4th ed. Cambridge: Cambridge University Press.
- Submitted on December 10, 2004; resubmitted on 5 May, 2005; accepted on 12 May, 2005*
